# Supplementary material for: Novel missense ACAN gene variants linked to familial osteochondritis dissecans cluster in the C-terminal globular domain of aggrecan
Source: PubMed Central journal article supplement (PMC8956744; doi:10.1038/s41598-022-09211-y), 2022-03-25
Supplement: 41598_2022_9211_MOESM1_ESM.pdf [file 41598_2022_9211_MOESM1_ESM.pdf]

## Supplementary information

### **Novel missense *ACAN* gene variants linked to familial osteochondritis dissecans cluster in the C-terminal globular domain of aggrecan**

Eva-Lena Stattin<sup>1#</sup>, Karin Lindblom<sup>2</sup>, André Struglics<sup>3</sup>, Patrik Önnerfjord<sup>2</sup>, Jack Goldblatt<sup>4</sup>, Abhijit Dixit<sup>5</sup>, Ajoy Sarkar<sup>5</sup>, Tabitha Randell<sup>6</sup>, Mohnish Suri<sup>5</sup>, Cathleen Raggio<sup>7</sup>, Jessica Davis<sup>7</sup>, Erin Carter<sup>7</sup> and Anders Aspberg<sup>2\*</sup>

<sup>1</sup>Department of Immunology, Genetics and Pathology, Uppsala University, Uppsala, Sweden

<sup>2</sup>Rheumatology and Molecular Skeletal Biology, Department of Clinical Sciences Lund, Lund University, Sweden

<sup>3</sup>Orthopaedics, Department of Clinical Sciences Lund, Lund University, Lund, Sweden

<sup>4</sup>Genetic Services & Familial Cancer Program of Western Australia, King Edward Memorial Hospital for Women, Perth, WA, Perth, Australia

<sup>5</sup>Department of Clinical Genetics, Nottingham University Hospitals NHS Trust, Nottingham, United Kingdom

<sup>6</sup>Department of Paediatric Endocrinology, Nottingham University Hospitals NHS Trust, Nottingham, United Kingdom

<sup>7</sup>Kathryn O. and Alan C. Greenberg Center for Skeletal Dysplasias, Hospital for Special Surgery, New York, New York, USA

<sup>#</sup>Previously at the Department of Medical Biosciences, Medical and Clinical Genetics, Umeå University Hospital, Umeå, Sweden

\*Address correspondence to:

Anders Aspberg, Rheumatology and Molecular Skeletal Biology, Department of Clinical Sciences Lund, Lund University, BMC-C12, 22184 Lund, Sweden.

E-mail address: [anders.aspberg@med.lu.se](mailto:anders.aspberg@med.lu.se)

**Supplemental table 1**

**Overview of skeletal effects of ACAN variants (December 2021)**

| <b>cDNA level <sup>1</sup></b>  | <b>Protein level <sup>1</sup></b> | <b>Affected domain</b> | <b>Phenotype <sup>2</sup></b>                                        | <b>Inheritance</b> | <b>Ref</b> |
|---------------------------------|-----------------------------------|------------------------|----------------------------------------------------------------------|--------------------|------------|
| Translocation t(10;15)          | -                                 | Intron 1               | SS                                                                   | AD                 | [1]        |
| c.-7-2A>C*                      | -                                 | Intron 1               | SEDK                                                                 | AD                 | [2]        |
| c.6_13delCACTTTAC <sup>4</sup>  | p.Thr3Leufs*21                    | Signal pept            | SS                                                                   | AD                 | [3]        |
| c.6_17delinsTCT                 | p.Thr3_Trp6delinsLeu              | Signal pept            | SS                                                                   | AD                 | [4]        |
| c.61G>T                         | p.Glu21*                          | G1 A                   | SS, AdvBA, facial dysmorphism, mild skeletal effects                 | AD                 | [2, 5]     |
| c.71_1051del                    | p.His25_Thr350del                 | G1 AB                  | SS, AdvBA, OA, Spine deformities                                     | AD                 | [6]        |
| c.116dupT                       | p.Arg40Glufs*51                   | G1 A                   | SS, facial dysmorphism, mild skeletal effects                        | AD                 | [7]        |
| <b>c.151T&gt;G <sup>5</sup></b> | <b>p.Cys51Gly <sup>5</sup></b>    | G1 A                   | SS                                                                   | AD                 | [8]        |
| c.217delA                       | p.Ile73Serfs*12                   | G1 A                   | SS                                                                   | Not analyzed       | [9]        |
| <b>c.223T&gt;C</b>              | <b>p.Trp75Arg</b>                 | G1 A                   | SS, AdvBA, OA, IDD                                                   | AD                 | [5]        |
| c.272delA                       | p.Arg93Alafs*41                   | G1 A                   | SS, AdvBA, IDD, mild midface hypoplasia, short thumbs                | AD                 | [5, 10]    |
| c.301C>T                        | p.Gln101*                         | G1 A                   | SS, DelBA, OA, IDD                                                   | AD                 | [6]        |
| <b>c.350C&gt;T</b>              | <b>p.Thr117Ile</b>                | G1 A                   | SS                                                                   | AD                 | [11]       |
| <b>c.371G&gt;A</b>              | <b>p.Arg124His</b>                | G1 A                   | SS, DelBA, mild skeletal defects                                     | AD                 | [2, 12]    |
| c.410_418delinsTGGA             | p.His137Leufs*31                  | G1 A                   | SS, AdvBA                                                            | AD                 | [6]        |
| c.436delC                       | p.Leu146Trpfs*5                   | G1 A                   | SS                                                                   | AD                 | [4]        |
| c.492C>G                        | p.Tyr164*                         | G1 B                   | SS, AdvBA, OA, IDD                                                   | AD                 | [5]        |
| <b>c.512C&gt;T</b>              | <b>p.Ala171Val</b>                | G1 B                   | SS, AdvBA                                                            | AD                 | [13]       |
| c.515delA                       | p.Gln172Argfs*59                  | G1 B                   | SS                                                                   | AD                 | [8]        |
| <b>c.532A&gt;T</b>              | <b>p.Asn178Tyr</b>                | G1 B                   | SS, AdvBA                                                            | AD                 | [5, 14]    |
| c.560dupA                       | p.Leu188Alafs*13                  | G1 B                   | SS, DelBA                                                            | AD                 | [11]       |
| c.631_632insA                   | p.Tyr211* <sup>3</sup>            | G1 B                   | SS, AdvBA                                                            | Not analyzed       | [11]       |
| c.661delT                       | p.Tyr221Metfs*10                  | G1 B                   | SS                                                                   | AD                 | [3]        |
| <b>c.742G&gt;A</b>              | <b>p.Ala248Thr</b>                | G1 B                   | SS, mild skeletal defects                                            | AD                 | [2]        |
| <b>c.903G&gt;C</b>              | <b>p.Trp301Cys</b>                | G1 B'                  | <b>FOCD</b> , SS, facial dysmorphism, mild skeletal effects, OA, IDD | AD                 | [2, 5, 12] |

|                        |                    |       |                                                                                      |                                                    |             |
|------------------------|--------------------|-------|--------------------------------------------------------------------------------------|----------------------------------------------------|-------------|
| <b>c.916A&gt;T</b>     | <b>p.Ser306Cys</b> | G1 B' | SS, AdvBA, IDD                                                                       | AD                                                 | [5]         |
| <b>c.973G&gt;A</b>     | <b>p.Val325Met</b> | G1 B' | SS, craniofacial dysmorphism, kyphosis, trident hands                                | Not analyzed (compound heterozygous for c.2902T>C) | [15]        |
| <b>c.1046A&gt;G</b>    | <b>p.Tyr349Cys</b> | G1 B' | SS only                                                                              | Not analyzed                                       | [16]        |
| c.1047_1048delinsAC    | p.Tyr349*          | G1 B' | SS                                                                                   | AD                                                 | [5]         |
| c.1117_1120delCAGA     | p.Thr374*          | IGD   | SS                                                                                   | AD                                                 | [3]         |
| c.1180C>T              | p.Arg394*          | IGD   | <b>FOCD</b> , SS                                                                     | Compound heterozygous for NPR2 mutation            | [8]         |
| c.1243G>T <sup>3</sup> | p.Glu415*          | IGD   | SS, OA, IDD                                                                          | AD                                                 | [5]         |
| c.1411C>T              | p.Gln471*          | IGD   | SS                                                                                   | AD                                                 | [11, 17]    |
| c.1425delA             | p.Val478Serfs*14   | G2 B  | SS, OA                                                                               | AD                                                 | [5]         |
| c.1467C>G              | p.Tyr489*          | G2 B  | SS, AdvBA                                                                            | de novo                                            | [11]        |
| <b>c.1505G&gt;C</b>    | <b>p.Arg502Pro</b> | G2 B  | SS only                                                                              | Not analyzed                                       | [16]        |
| c.1526C>A              | p.Ser509*          | G2 B  | SS, OA                                                                               | AD                                                 | [5]         |
| c.1531-1532delGA       | p.Glu511Alafs*10   | G2 B  | SS                                                                                   | Not analyzed                                       | [18]        |
| c.1551C>G              | p.Tyr517*          | G2 B  | SS                                                                                   | AD                                                 | [9]         |
| <b>c.1598C&gt;T</b>    | <b>p.Thr533Ile</b> | G2 B  | SEDK                                                                                 | AD                                                 | [2]         |
| c.1608C>A              | p.Tyr536*          | G2 B  | SS, AdvBA, mild osteochondral defects, OA, mild midface hypoplasia, broad great toes | AD                                                 | [2, 12, 19] |
| <b>c.1702G&gt;A</b>    | <b>p.Asp568Asn</b> | G2 B  | <b>OCD</b> , SS                                                                      | AD                                                 | [8]         |
| c.1733-1G>A            |                    | G2 B  | SS                                                                                   | AD                                                 | [17]        |
| c.1744delT             | p.Phe582Serfs*69   | G2 B' | SS, IVD                                                                              | AD                                                 | [20]        |
| c.1762C>T              | p.Gln588*          | G2 B' | SS                                                                                   | AD                                                 | [17]        |
| c.1774C>T              | p.Gln592*          | G2 B' | SS                                                                                   | AD                                                 | [8]         |
| <b>c.1817C&gt;A</b>    | <b>p.Ala606Asp</b> | G2 B' | SS                                                                                   | AD                                                 | [17]        |
| c.1861A>T              | p.Lys621*          | G2 B' | SS, AdvBA                                                                            | Not analyzed                                       | [11]        |
| c.1880_1883dupTGGC     | p.Asp629Glyfs*31   | G2 B' | SS, AdvBA                                                                            | AD                                                 | [11]        |
| <b>c.1930G&gt;A</b>    | <b>p.Gly644Ser</b> | G2 B' | SS, mild skeletal defects                                                            | AD                                                 | [2, 12]     |
| <b>c.1948G&gt;A</b>    | <b>p.Val650Met</b> | G2 B' | SS, DelBA, mild skeletal defects                                                     | AD                                                 | [2, 12]     |
| <b>c.1979C&gt;T</b>    | <b>p.Thr660Met</b> | G2 B' | SS only                                                                              | Not analyzed                                       | [16]        |
| c.2026+1G>A            |                    | G2 B' | SS, mild midface hypoplasia, brachydactyly                                           | AD                                                 | [5, 10]     |

|                     |                                |           |                                                           |                                                    |         |
|---------------------|--------------------------------|-----------|-----------------------------------------------------------|----------------------------------------------------|---------|
| c.2099G>A           | p.Trp700*                      | KS        | SS, AdvBA, Spine deformities                              | AD                                                 | [6]     |
| <b>c.2164C&gt;G</b> | <b>p.Pro722Ala</b>             | KS        | SS                                                        | AD                                                 | [21]    |
| c.2173delG          | p.Glu725Argfs*6                | KS        | SS, AdvBA                                                 | AD                                                 | [11]    |
| <b>c.2218A&gt;T</b> | <b>p.Thr740Ser</b>             | KS        | SS, facial dysmorphism, mild skeletal effects             | AD                                                 | [2, 12] |
| <b>c.2266G&gt;C</b> | <b>p.Gly756Arg</b>             | KS        | SS                                                        | AD                                                 | [17]    |
| c.2367delC          | p.Ser790Glnfs*20               | KS        | SS, vertebral column,                                     | AD                                                 | [7]     |
| c.2369C>G           | p.Ser790*                      | KS        | SS, facial dysmorphism, mild skeletal effects             | De novo                                            | [2, 12] |
| c.2441C>G           | p.Ser814*                      | KS        | SS, early onset OA, vertebral column                      | AD                                                 | [22]    |
| c.2535_2536insTTCA  | p.Pro846Phefs*9                | KS        | SS only                                                   | Not analyzed                                       | [16]    |
| c.2863_2864delAG    | p.Ser955Trpfs*473              | GAG, CS-1 | SS                                                        | AD                                                 | [4]     |
| c.2902T>C           | p.Ser968Pro                    | GAG, CS-1 | SS, craniofacial dysmorphism, kyphosis, trident hands     | Not analyzed (compound heterozygous for c.973G>A)  | [15]    |
| c.3758dupC          | p.Gly1254Trpfs*175             | GAG, CS-1 | SEDK                                                      | AD                                                 | [23]    |
| <b>c.4138G&gt;T</b> | <b>p.Val1380Phe</b>            | GAG, CS-1 | SEMD (mild)                                               | Not analyzed (compound heterozygous for c.5061T>A) | [24]    |
| <b>c.4259A&gt;G</b> | <b>p.Glu1420Gly</b>            | GAG, CS-1 | SS only                                                   | Not analyzed                                       | [16]    |
| c.4390delG          | p.Val1464*                     | GAG, CS-1 | <b>f</b> OCD, SS, craniofacial dysmorphism, brachydactyly | AD                                                 | [25]    |
| c.4634delT          | p.Leu1545Profs*11              | GAG, CS-1 | SS, IDD                                                   | AD                                                 | [26]    |
| c.4657G>T           | p.Glu1553*                     | GAG, CS-1 | SS, OA, IDD                                               | AD                                                 | [5]     |
| c.4762_4765delGGGT  | p.Gly1588Cysfs*26              | GAG, CS-1 | SS, AdvBA, mild midface hypoplasia, broad great toes      | AD                                                 | [19]    |
| c.4852C>T           | p.Gln1618*                     | GAG, CS-2 | SS, DelBA, OA                                             | AD                                                 | [27]    |
| <b>c.5061T&gt;A</b> | <b>p.Ser1687Arg</b>            | GAG, CS-2 | SEMD (mild)                                               | Not analyzed (compound heterozygous for c.4138G>T) | [24]    |
| c.5391delG          | p.Gln1798Serfs*53 <sup>3</sup> | GAG, CS-2 | SS, AdvBA,                                                | AD                                                 | [5, 28] |

|                                              |                                       |           |                                                                               |              |            |
|----------------------------------------------|---------------------------------------|-----------|-------------------------------------------------------------------------------|--------------|------------|
|                                              |                                       |           | mild midface hypoplasia                                                       |              |            |
| c.5443delC                                   | p.Leu1815Trpfs*36                     | GAG, CS-2 | SS, DelBA                                                                     | Not analyzed | [11]       |
| c.5579delC                                   | p.Gly1861Glufs*41                     | GAG, CS-2 | SS, AdvBA                                                                     | Not analyzed | [11]       |
| c.5597C>A                                    | p.Ser1866*                            | GAG, CS-2 | SS                                                                            | de novo      | [8]        |
| c.5658delG                                   | p.Phe1887Leufs*15                     | GAG, CS-2 | OCD, SS                                                                       | AD           | [29]       |
| <b>c.6142C&gt;G</b>                          | <b>p.Pro2048Ala</b>                   | GAG, CS-2 | SS, mild skeletal defects                                                     | AD           | [2, 12]    |
| c.6404delC                                   | p.Ala2135Aspfs                        | GAG, CS-2 | Mild SS, AdvBA                                                                | de novo      | [27]       |
| <b>c.6530T&gt;C</b>                          | <b>p.Val2177Ala</b>                   | GAG, CS-2 | SS only, polymorphism                                                         | Not analyzed | [16]       |
| c.6861delC                                   | p.Cys2288Valfs*28                     | G3, EGF1  | SS, DelBA                                                                     | Not analyzed | [11]       |
| c.7121dup (c.7007dup)                        | p.Asp2374Glyfs*9 (p.Asp2337Glyfs*9)   | G3, CLD   | SS, AdvBA                                                                     | AD           | [30]       |
| <b>c.7084T&gt;C</b> (c.6970T>C)              | <b>p.Trp2362Arg</b> (p.Trp2324Arg)    | G3, CLD   | OCD, SS, facial dysmorphism, mild skeletal effects                            | AD           | [31]       |
| c.7085G>A (c.6971G>A)                        | p.Trp2362* (p.Trp2324*)               | G3, CLD   | SS                                                                            | Not analyzed | [18]       |
| c.7155delG (c.7041delG)                      | p.Cys2386Valfs*8 (p.Cys2348Valfs*8)   | G3, CLD   | OCD, SS, DelBA, OA                                                            | AD           | [6]        |
| <b>c.7156T&gt;A</b> (c.7042T>A)              | <b>p.Cys2386Ser</b> (p.Cys2348Ser)    | G3, CLD   | FOCD, SS, OA                                                                  | AD           | This study |
| <b>c.7178T&gt;C</b> (c.7064T>C)              | <b>p.Leu2393Pro</b> (p.Leu2355Pro)    | G3, CLD   | OCD, SS, AdvBA, OA, short thumbs                                              | AD           | [5, 10]    |
| <b>c.7183A&gt;T</b> (c.7069A>T)              | <b>p.Ser2395Cys</b> (p.Ser2357Cys)    | G3, CLD   | SS, DelBA                                                                     | AD           | [6]        |
| <b>c.7196C&gt;T</b>                          | <b>p.Pro2399Leu</b>                   | G3, CLD   | SS                                                                            | AD           | [11]       |
| c.7204C>T (c.7090C>T)                        | p.Gln2402* (p.Gln2364*)               | G3, CLD   | OCD, SS, AdvBA, OA, mild midface hypoplasia, joint problems, broad great toes | AD           | [19]       |
| <b>c.7205A&gt;C</b> (c.7091A>C) <sup>3</sup> | <b>p.Gln2402Pro</b> (p.Gln2364Pro)    | G3, CLD   | SS, mild skeletal defects                                                     | AD           | [32]       |
| c.7207-7209delGAG (c.7093_7095delGAG)        | p.Glu2403del (p.Glu2365del)           | G3, CLD   | SS only                                                                       | Not analyzed | [16]       |
| <b>c.7250T&gt;C</b> (c.7136T>C)              | <b>p.Leu2417Pro</b> (p.Leu2379Pro)    | G3, CLD   | FOCD, SS, OA                                                                  | AD           | This study |
| <b>c.7255G&gt;A</b> (c.7141G>A)              | <b>p.Asp2419Asn</b> (p.Asp2381Asn)    | G3, CLD   | SEMD                                                                          | AR           | [33]       |
| <b>c.7267G&gt;A</b> (c.7153G>A)              | <b>p.Glu2423Lys</b> (p.Glu2385Lys)    | G3, CLD   | SS, OA, IDD                                                                   | AD           | [5]        |
| c.7317G>A (c.7203G>A)                        | p.Trp2439* (p.Trp2401*)               | G3, CLD   | SS, OA, IDD                                                                   | AD           | [5]        |
| c.7336dupA (c.7222dupA)                      | p.Asn2446Lysfs*22 (p.Asn2407Lysfs*22) | G3, CLD   | SS, AdvBA                                                                     | Not analyzed | [34]       |
| <b>c.7358A&gt;T</b> (c.7244A>T)              | <b>p.Asp2453Val</b> (p.Asp2415Val)    | G3, CLD   | FOCD, SS, OA                                                                  | AD           | This study |

|                                      |                                            |           |                                                      |    |         |
|--------------------------------------|--------------------------------------------|-----------|------------------------------------------------------|----|---------|
| <b>c.7361G&gt;A</b> (c.2416G>A)      | <b>p.Cys2454Tyr</b><br>(p.Cys2416Tyr)      | G3, CLD   | SS                                                   | AD | [35]    |
| <b>c.7363G&gt;A</b> (c.7249G>A)      | <b>p.Val2455Met</b><br>(p.Val2417Met)      | G3, CLD   | <b>FOCD</b> , SS, OA, IDD                            | AD | [5, 36] |
| c.7381delG (c.7267delG) <sup>3</sup> | p.Glu2461Argfs*148<br>(p.Glu2423Argfs*148) | G3, CLD   | SS, AdvBA, facial dysmorphism, mild skeletal effects | AD | [2]     |
| <b>c.7390G&gt;A</b> (c.7276G>A)      | <b>p.Glu2464Lys</b><br>(p.Glu2426Lys)      | G3, CLD   | SS, facial dysmorphism, mild skeletal effects        | AD | [2, 12] |
| c.7390G>T (c.7276G>T)                | p.Glu2464*<br>(p.Glu2426*)                 | G3, CLD   | SS, facial dysmorphism, mild skeletal effects        | AD | [2, 5]  |
| <b>c.7456G&gt;A</b> (c.7342G>A)      | <b>p.Gly2486Arg</b><br>(p.Gly2448Arg)      | G3, Sushi | SS, facial dysmorphism, mild skeletal effects        | AD | [2]     |
| <b>c.7583G&gt;A</b> (c.7469G>A)      | <b>p.Cys2528Tyr</b><br>(p.Cys2490Tyr)      | G3, Sushi | SS                                                   | AD | [17]    |

<sup>1</sup> Sequence numbering is based on the full length ACAN variant 3 (NM\_001369268.1). This sequence is identical to ACAN variant 2 (NM\_013227.3) until nucleotide 6946, when the alternatively spliced EGF2 repeat is inserted in variant 3. For entries after this point, numbering based on NM\_013227.3 is given in parenthesis.

<sup>2</sup> SS, short stature

SS only, no craniofacial, skeletal or joint symptoms and parents of normal height.

AdvBA, advanced bone age vs chronological age

DelBA, delayed bone age vs chronological age

OA, osteoarthritis

OCD, osteochondritis dissecans (reported only for proband)

fOCD, familial OCD linked to the ACAN variant

IDD, intervertebral disc disease

<sup>3</sup> Labeled differently in original publication

<sup>4</sup> Gray background indicates non-globular parts of the aggrecan core protein

<sup>5</sup> Bold typeface marks missense variants

### Referenses for Supplemental Table 1

1. Crippa, M., et al., *A balanced reciprocal translocation t(10;15)(q22.3;q26.1) interrupting ACAN gene in a family with proportionate short stature*. J Endocrinol Invest, 2018. **41**(8): p. 929-936.
2. Sentchordi-Montane, L., et al., *Heterozygous aggrecan variants are associated with short stature and brachydactyly: Description of 16 probands and a review of the literature*. Clin Endocrinol (Oxf), 2018. **88**(6): p. 820-829.
3. Hu, X., et al., *Novel pathogenic ACAN variants in non-syndromic short stature patients*. Clin Chim Acta, 2017. **469**: p. 126-129.
4. Hu, X., et al., *Proband-only medical exome sequencing as a cost-effective first-tier genetic diagnostic test for patients without prior molecular tests and clinical diagnosis in a developing country: the China experience*. Genet Med, 2018. **20**(9): p. 1045-1053.
5. Gkourogianni, A., et al., *Clinical characterization of patients with autosomal dominant short*

- stature due to aggrecan mutations*. J Clin Endocrinol Metab, 2016: p. jc20163313.
6. Stavber, L., et al., *High frequency of pathogenic ACAN variants including an intragenic deletion in selected individuals with short stature*. Eur J Endocrinol, 2020. **182**(3): p. 243-253.
  7. Wei, M., et al., *Identification of novel ACAN mutations in two Chinese families and genotype-phenotype correlation in patients with 74 pathogenic ACAN variations*. Mol Genet Genomic Med, 2021: p. e1823.
  8. Hauer, N.N., et al., *Genetic screening confirms heterozygous mutations in ACAN as a major cause of idiopathic short stature*. Sci Rep, 2017. **7**(1): p. 12225.
  9. Ahn, J., et al., *Next-generation sequencing-based mutational analysis of idiopathic short stature and isolated growth hormone deficiency in Korean pediatric patients*. Mol Cell Endocrinol, 2021: p. 111489.
  10. Nilsson, O., et al., *Short stature, accelerated bone maturation, and early growth cessation due to heterozygous aggrecan mutations*. J Clin Endocrinol Metab, 2014. **99**(8): p. E1510-8.
  11. Lin, L., et al., *A High Proportion of Novel ACAN Mutations and Their Prevalence in a Large Cohort of Chinese Short Stature Children*. J Clin Endocrinol Metab, 2021. **106**(7): p. e2711-e2719.
  12. Sentchordi-Montané, L., et al., *High prevalence of variants in skeletal dysplasia associated genes in individuals with short stature and minor skeletal anomalies*. Eur J Endocrinol, 2021.
  13. Kim, T.Y., et al., *Identification of a heterozygous ACAN mutation in a 15-year-old boy with short stature who presented with advanced bone age: a case report and review of the literature*. Ann Pediatr Endocrinol Metab, 2020. **25**(4): p. 272-276.
  14. Freire, B.L., et al., *Multigene Sequencing Analysis of Children Born Small for Gestational Age With Isolated Short Stature*. J Clin Endocrinol Metab, 2019. **104**(6): p. 2023-2030.
  15. Panigrahi, I., et al., *Phenotypic heterogeneity of kyphoscoliosis with vertebral and rib defects: a case series*. Clin Dysmorphol, 2019. **28**(3): p. 103-113.
  16. Hattori, A., et al., *Next generation sequencing-based mutation screening of 86 patients with idiopathic short stature*. Endocr J, 2017. **64**(10): p. 947-954.
  17. Liang, H., et al., *Growth-Promoting Therapies May Be Useful In Short Stature Patients With Nonspecific Skeletal Abnormalities Caused By Acan Heterozygous Mutations: Six Chinese Cases And Literature Review*. Endocr Pract, 2020. **26**(11): p. 1255-1268.
  18. He, D., et al., *Molecular diagnosis for growth hormone deficiency in Chinese children and adolescents and evaluation of impact of rare genetic variants on treatment efficacy of growth hormone*. Clin Chim Acta, 2021. **524**: p. 1-10.
  19. van der Steen, M., et al., *ACAN Gene Mutations in Short Children Born SGA and Response to Growth Hormone Treatment*. J Clin Endocrinol Metab, 2017. **102**(5): p. 1458-1467.
  20. Dateki, S., et al., *Identification of a novel heterozygous mutation of the Aggrecan gene in a family with idiopathic short stature and multiple intervertebral disc herniation*. J Hum Genet, 2017. **62**(7): p. 717-721.
  21. Wang, Y., et al., *Short stature with precocious puberty caused by aggrecan gene mutation: A case report*. Medicine (Baltimore), 2020. **99**(34): p. e21635.
  22. Ruault, V., et al., *Clinical and Molecular Spectrum of Nonsyndromic Early-Onset Osteoarthritis*. Arthritis Rheumatol, 2020. **72**(10): p. 1689-1693.
  23. Gleghorn, L., et al., *A mutation in the variable repeat region of the aggrecan gene (AGC1) causes a form of spondyloepiphyseal dysplasia associated with severe, premature osteoarthritis*. Am J Hum Genet, 2005. **77**(3): p. 484-90.
  24. Fukuhara, Y., et al., *The second report on spondyloepimetaphyseal dysplasia, aggrecan type: a milder phenotype than originally reported*. Clin Dysmorphol, 2019. **28**(1): p. 26-29.
  25. Mancioffi, V., et al., *Retrospective Diagnosis of a Novel ACAN Pathogenic Variant in a Family With Short Stature: A Case Report and Review of the Literature*. Front Genet, 2021. **12**: p. 708864.
  26. Uchida, N., et al., *A novel mutation in the ACAN gene in a family with autosomal dominant short stature and intervertebral disc disease*. Hum Genome Var, 2020. **7**(1): p. 44.
  27. Tatsi, C., et al., *Aggrecan Mutations in Nonfamilial Short Stature and Short Stature Without Accelerated Skeletal Maturation*. J Endocr Soc, 2017. **1**(8): p. 1006-1011.

28. Quintos, J.B., M.H. Guo, and A. Dauber, *Idiopathic short stature due to novel heterozygous mutation of the aggrecan gene*. J Pediatr Endocrinol Metab, 2015. **28**(7-8): p. 927-32.
29. Denis, A., et al., *Variable expressivity in a family with an aggrecanopathy*. Mol Genet Genomic Med, 2021: p. e1773.
30. Ye, X., et al., *Dual diagnosis of osteogenesis imperfecta (OI) and short stature and advanced bone age with or without early-onset osteoarthritis and/or osteochondritis dissecans (SSOAOD) reveals a cumulative effect on stature caused by mutations in COL1A1 and ACAN genes*. Eur J Med Genet, 2020. **63**(12): p. 104074.
31. Florio, A., et al., *A child with a novel ACAN missense variant mimicking a septic arthritis*. Ital J Pediatr, 2019. **45**(1): p. 148.
32. Xu, D., et al., *Novel aggrecan variant, p. Gln2364Pro, causes severe familial nonsyndromic adult short stature and poor growth hormone response in Chinese children*. BMC Med Genet, 2018. **19**(1): p. 79.
33. Tompson, S.W., et al., *A recessive skeletal dysplasia, SEMD aggrecan type, results from a missense mutation affecting the C-type lectin domain of aggrecan*. Am J Hum Genet, 2009. **84**(1): p. 72-9.
34. Yang, L., et al., *Pathogenic gene screening in 91 Chinese patients with short stature of unknown etiology with a targeted next-generation sequencing panel*. BMC Med Genet, 2018. **19**(1): p. 212.
35. Benonisdottir, S., et al., *Epigenetic and genetic components of height regulation*. Nat Commun, 2016. **7**: p. 13490.
36. Stattin, E.L., et al., *A missense mutation in the aggrecan C-type lectin domain disrupts extracellular matrix interactions and causes dominant familial osteochondritis dissecans*. Am J Hum Genet, 2010. **86**(2): p. 126-37.



**a) Family 1**

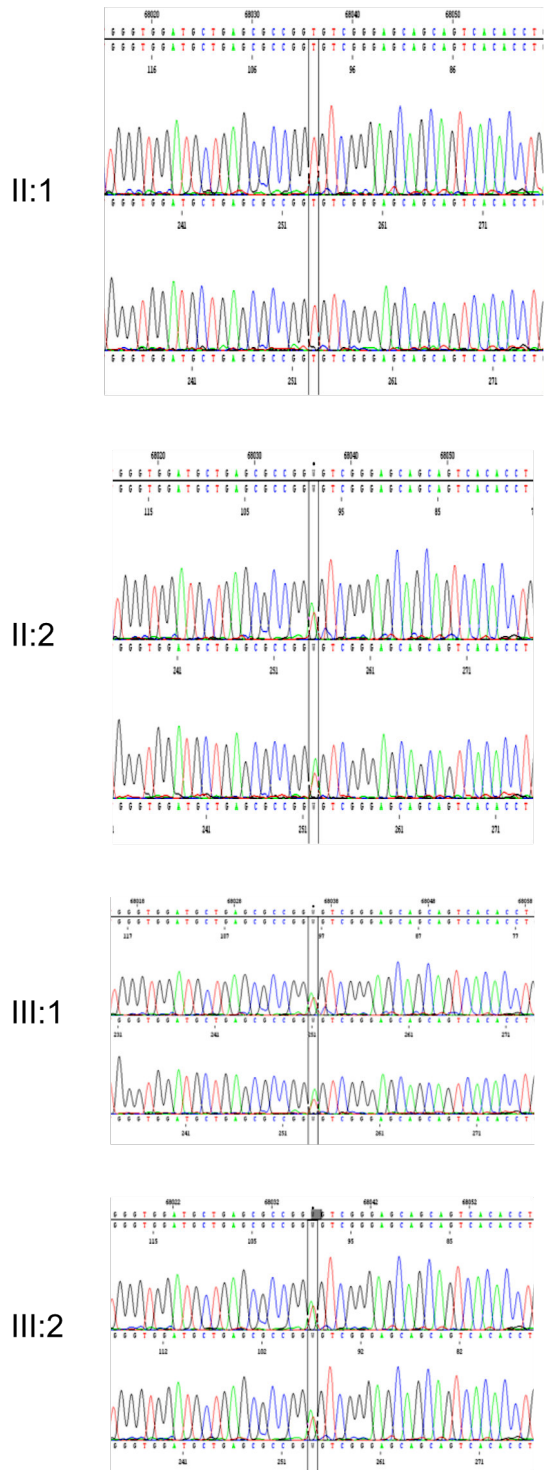

**b) Family 2**

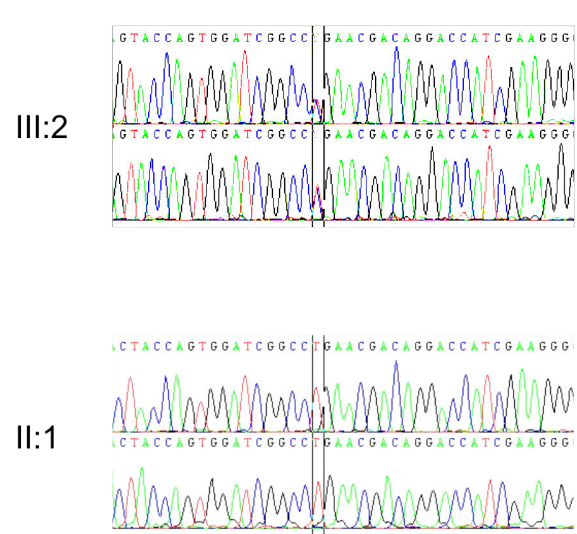

**Supplemental figure 1. Genomic DNA sequencing**

**a)** Sequence traces from Family 1 proband (III:1), sister (III:2), mother (II:2) and father (II:1).

**b)** Sequence traces from Family 2 proband (III:2) and father (II:1). The sibling (III:1) and mother (II:2) of the proband showed the same C>T variation as III:2.

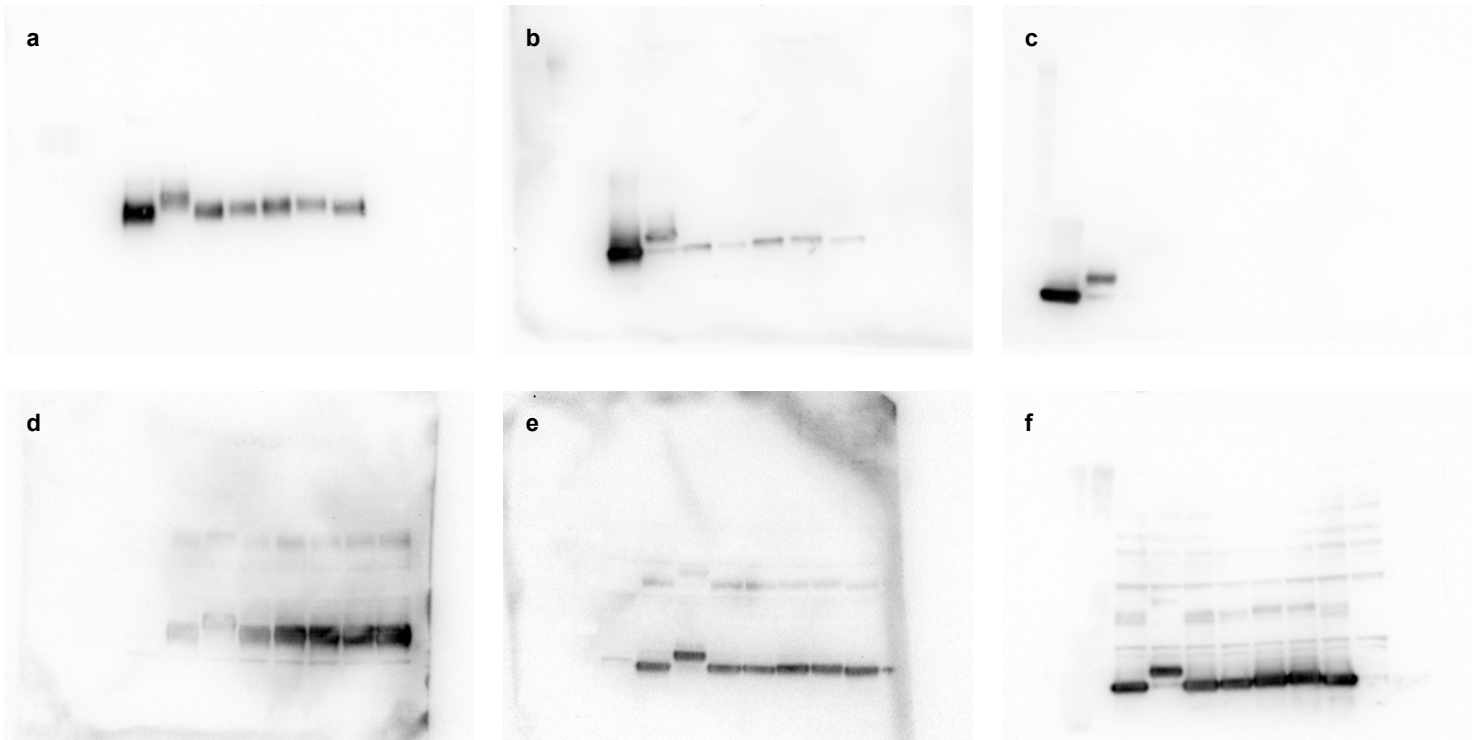

**Figure S2. Un-cropped western blots.**

Original digital images of western blots, shown cropped in Figure 5a-f.
